# Supplementary material for: Effects of A6E Mutation on Protein Expression and Supramolecular Assembly of Yeast Asparagine Synthetase
Source: MDPI journal article supplement (doi:10.3390/biology10040294), 2021-04-03
Supplement: s1 [file s1]

```

P08243 ASNS_HUMAN      1  MCGIWAIFGSDDCLSVQC---LSAMKIAHRGPDADFRENNGYTNCCFGFHLAVVDPLF
P49089 ASNSI_YEAST      1  MCGIHAIFRHHEDVHRYKPKALQLSKRIRHRGPDWSGNA---IKNSTIFVHERLAIVGVES
      *****
      * * * * *
      * * * * *

P08243 ASNS_HUMAN     58  GMQPIRVKKYPYLWLCYNGEIYNHKKMQQH-FEFYQTKVDGEIILHLYDKGGIEQITCM
P49089 ASNSI_YEAST     58  GAQPIITSSDGEY-MLCVNGEIYNHIQLREECADYEFGLTSDCEPIIPMYLKHDIDAP-KY
      * * * * *
      * * * * *
      * * * * *

P08243 ASNS_HUMAN    117  LDGVFAFVLLDTANKKVFVLRDRTYGVRLPFLKAMTEDGFLAV--CSEAKGLVTLKHSATPF
P49089 ASNSI_YEAST    116  LDGMFAWTLTYDAKQDRIVAARDPIGITTLYMGRSSASPKTVYFASELKCL-----TDDC
      * * * * *
      * * * * *
      * * * * *

P08243 ASNS_HUMAN    175  LKVEPFLPGHYEVLDLKPNGKVASVEMVKYHHCARDVPLHALYDNVEKLPFGFEIETVKNN
P49089 ASNSI_YEAST    170  DTITAFPPGHVYDSKTD-----KITRYFTPD-----WL--DEKRIPTPID--YMA
      * * * * *
      * * * * *
      * * * * *

P08243 ASNS_HUMAN    235  LRILFNNAVVKRRLMTRRIGCLLSGGLDSSLVAATLLKQLKEA-----
P49089 ASNSI_YEAST    212  IRHSLEKAVRKRMLAEVPYGVLLSGGLDSSLIASIAARETAKATNDVEPSTYDSKARHLA
      * * * * *
      * * * * *
      * * * * *

P08243 ASNS_HUMAN    278  -----QVQYPLQTFAGMEDSPDLLAARKVADHIGSEHYEVLNFSEEGIQALDEV
P49089 ASNSI_YEAST    272  GIDDDGKLTHTAGWTSLSHFAIGLPNAPDLQAARKVAKFIGSIHHEHTFTLQEGLDALDDV
      * * * * *
      * * * * *
      * * * * *

P08243 ASNS_HUMAN    328  IFSLETYDITTVRASVGYMLISKYIRKNTDSVVIIFSFGESDELTOGYIYFHKAPSPEKAE
P49089 ASNSI_YEAST    332  IYHLETYDVTITRASTPMFLSRKIKAQG-VKMLVSGEGSDEIFGGYLYFAQAPSAAEFH
      * * * * *
      * * * * *
      * * * * *

P08243 ASNS_HUMAN    388  EESERLLRELYLFDVLRADRTTAAHGLELRVFLDHRFSSYLSLPPEMRI--PK-NGIE
P49089 ASNSI_YEAST    391  TESVQRVKNLHLADCLRANKSTMWGLEARVPFLDREFLQLCMNIDPNEKMIKPKEGRIE
      * * * * *
      * * * * *
      * * * * *

P08243 ASNS_HUMAN    445  KHLLETFFED-----SNLIPKEILWRPKEAFSDGITSVKNSWFKILQYVEHQVDDAMM
P49089 ASNSI_YEAST    451  KYILRKAFDFTTGEPAKPYLPEEILWRQKEQFSDGVG--YSWIDGLKDTAEAVISDEMF
      * * * * *
      * * * * *
      * * * * *

P08243 ASNS_HUMAN    499  ANAAQKFPFNTPKTKEGYYYRQVFERHYPGRADW-LSHYWMP--KWINATDPSARTLTHY
P49089 ASNSI_YEAST    508  ASPKAEWGSDIPTTKEAFWYRLKFDALFPQKTVAADVMMRWIPKADWGCADPSGRYAQIH
      * * * * *
      * * * * *
      * * * * *

P08243 ASNS_HUMAN    556  KSAVKA
P49089 ASNSI_YEAST    568  EKHIE-
      * * * * *
      * * * * *
      * * * * *

```

**Figure S1.** Amino acid sequence alignment of human and yeast asparagine synthetases. Amino acid sequences of human ASNS (P08243) and yeast Asn1p (P49089) were aligned using CLUSTALO available at [www.uniprot.org](http://www.uniprot.org). They showed 204 identical and 153 similar amino acid residues. The red box indicates the conserved alanine residue for our mutation study.

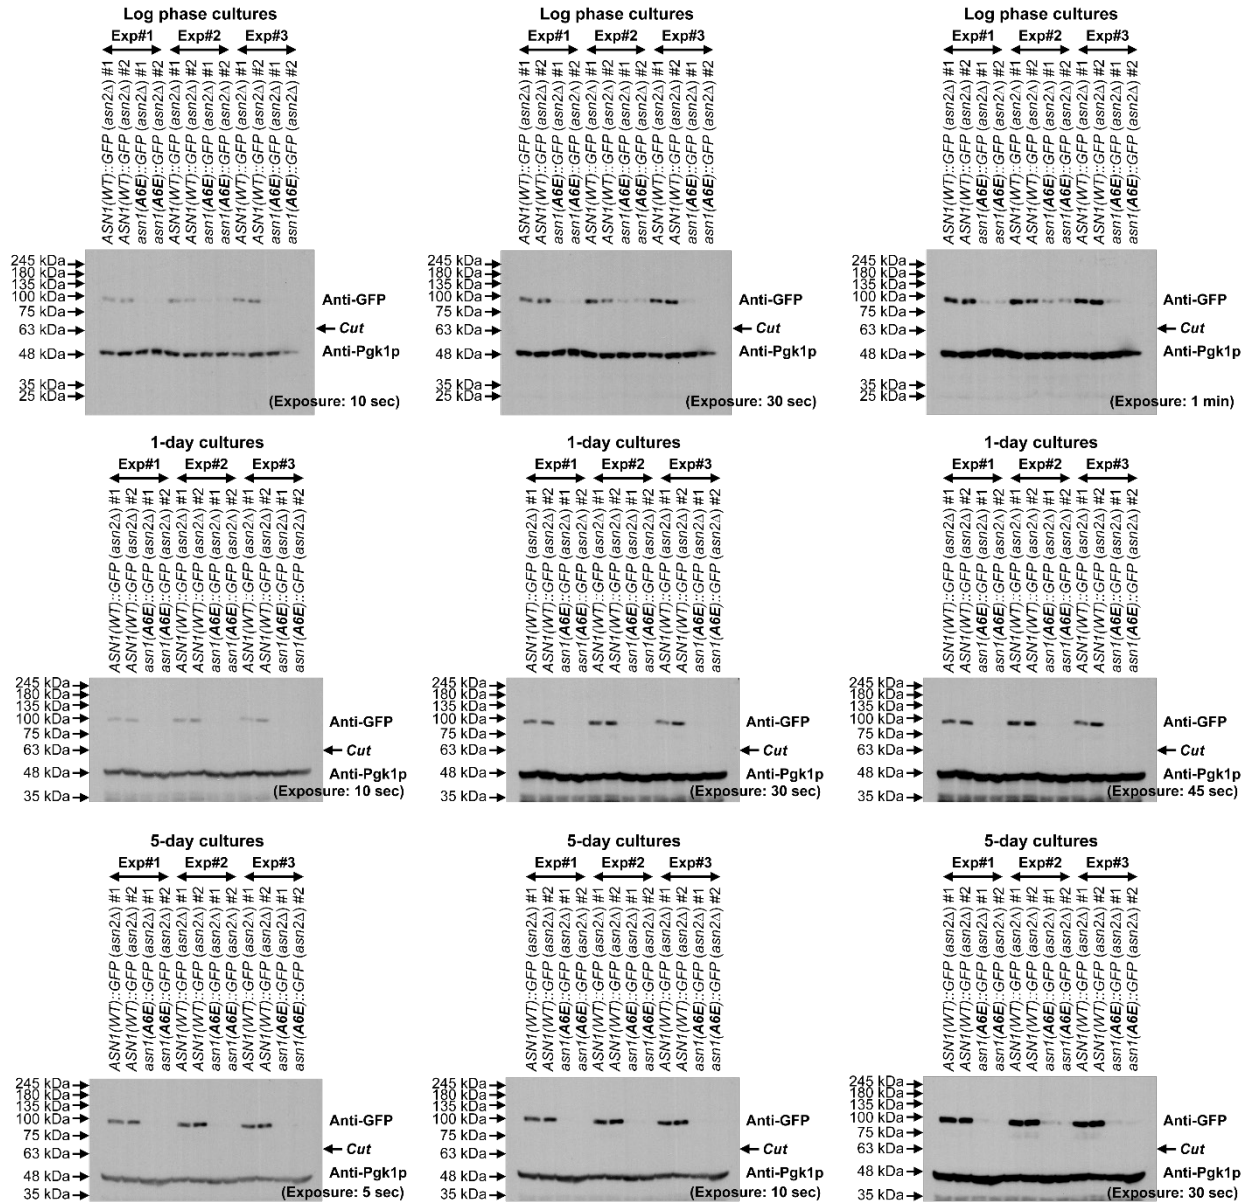

**Figure s2.** Expression levels of Asn1p(WT)-GFP vs. Asn1p(A6E)-GFP (in *asn2Δ* background). Two different clones of yeast *ASN1(WT)::GFP (asn2Δ)* and *asn1(A6E)::GFP (asn2Δ)* were grown in liquid YPD at 30 °C with shaking to log phase, saturation (1-day cultures), or stationary phase (5-day cultures). Then, 1, 5, or 10 OD<sub>600</sub> cells for log phase, 1-day, and 5-day cultures, respectively, were taken to prepare whole cell extracts for SDS-PAGE and Western blot analysis. Each membrane was cut into 2 pieces between 75 and 63 kDa bands of the pre-stained protein ladder. The upper piece of each divided blot was used to detect GFP-tagged Asn1p with anti-GFP (91.7 kDa for Asn1p(WT)-GFP, and 91.8 kDa for Asn1p(A6E)-GFP). The lower piece of each divided blot was used to detect Pgk1p (as internal loading control) (44.7 kDa). Three independent experiments were performed to confirm the results.

**Table S1.** List of primers used for recombinant plasmid modification (by PCR-based, site-directed mutagenesis), to make a DNA cassette for yeast transformation, and to prepare PCR products (of isolated yeast genomic DNA) for strain verification by DNA sequencing.

| Primer                                                                                                                                                                                                                                                                                    | Sequence                                                                                      | Description                                                                                                                                   | Used with | Product size |
|-------------------------------------------------------------------------------------------------------------------------------------------------------------------------------------------------------------------------------------------------------------------------------------------|-----------------------------------------------------------------------------------------------|-----------------------------------------------------------------------------------------------------------------------------------------------|-----------|--------------|
| <b>Primers for making DNA cassette</b> carrying (5' to 3'): 50 bp upstream of the <i>ASN2</i> start codon, hygromycin resistance gene, and 50 bp downstream of the <i>ASN2</i> stop codon ( <b>for transformation of yeast <i>BY4741</i></b> )                                            |                                                                                               |                                                                                                                                               |           |              |
| <b>Plasmid template:</b> pFA6a-hphMX6 (Addgene)                                                                                                                                                                                                                                           |                                                                                               |                                                                                                                                               |           |              |
| <b>Resulting yeast strain:</b> <i>asn2Δ</i>                                                                                                                                                                                                                                               |                                                                                               |                                                                                                                                               |           |              |
| JW2193                                                                                                                                                                                                                                                                                    | 5'-<br>TTGCTTCCCAGTTAAGCTCACCAAAACACAAA<br>TACTCACTACAATAACAATGGTCGACGGATCCC<br>CGGG -3'      | Forward; with 50 nt upstream of <i>ASN2</i> start codon and sequence homology to pFA6a-hphMX6 (underlined)                                    | JW2194    | 1811 bp      |
| JW2194                                                                                                                                                                                                                                                                                    | 5'-<br>CCGCATTTCTTGGTTCCTCGTCAATTATAAGA<br>ATACGATTGCGCTCGTAATCGATGAATTCGAG<br>CTCG -3'       | Reverse; with 50 nt downstream of <i>ASN2</i> stop codon and sequence homology to pFA6a-hphMX6 (underlined)                                   | JW2193    |              |
| <b>Primers for verifying the success of deleting <i>ASN2</i> from yeast genome</b>                                                                                                                                                                                                        |                                                                                               |                                                                                                                                               |           |              |
| <b>DNA template:</b> genomic DNA isolated from selected yeast transformants                                                                                                                                                                                                               |                                                                                               |                                                                                                                                               |           |              |
| <b>Verified yeast strain:</b> <i>asn2Δ</i>                                                                                                                                                                                                                                                |                                                                                               |                                                                                                                                               |           |              |
| JW2009                                                                                                                                                                                                                                                                                    | 5'- CATTGACTCATGGCAAGATTTCTCC -3'                                                             | Forward; located 200 nt upstream of <i>ASN2</i> start codon                                                                                   | JW1986    | 1355 bp      |
| JW1986                                                                                                                                                                                                                                                                                    | 5'- CTCCATACAAGCCAACCACG -3'                                                                  | Reverse; located at nt713-732 of hygromycin resistance coding sequence                                                                        | JW2009    |              |
| <b>Mutagenic primers for introducing A6E mutation codon (GCC → GAA) to <i>ASN1</i> coding sequence (PCR-based, site-directed mutagenesis)</b>                                                                                                                                             |                                                                                               |                                                                                                                                               |           |              |
| <b>Plasmid template:</b> pFA6a- <i>ASN1</i> -GFP-kanMX6 (Noree et al., 2019)                                                                                                                                                                                                              |                                                                                               |                                                                                                                                               |           |              |
| <b>Resulting plasmid:</b> pFA6a- <i>asn1</i> (A6E)-GFP-kanMX6                                                                                                                                                                                                                             |                                                                                               |                                                                                                                                               |           |              |
| JW2295                                                                                                                                                                                                                                                                                    | 5'-<br>ATGTGTGGTATTTTCGAAGCTTTCAGGCACGAA<br>-3'                                               | Forward; A6E mutation codon (underlined)                                                                                                      | JW2296    | 6593 bp      |
| JW2296                                                                                                                                                                                                                                                                                    | 5'- GTCGACCTGCAGCGTACGAAG -3'                                                                 | Reverse                                                                                                                                       | JW2295    |              |
| <b>Primers to prepare DNA cassette</b> carrying (5' to 3'): 50 bp upstream of <i>ASN1</i> start codon + <i>asn1</i> coding sequence (with A6E mutation codon) + <i>GFP</i> + <i>kanR</i> + 50 bp downstream of <i>ASN1</i> stop codon ( <b>for transformation of yeast <i>asn2Δ</i></b> ) |                                                                                               |                                                                                                                                               |           |              |
| <b>Plasmid template:</b> pFA6a- <i>asn1</i> (A6E)-GFP-kanMX6                                                                                                                                                                                                                              |                                                                                               |                                                                                                                                               |           |              |
| <b>Resulting yeast strain:</b> <i>asn1</i> (A6E):: <i>GFP</i> ( <i>asn2Δ</i> )                                                                                                                                                                                                            |                                                                                               |                                                                                                                                               |           |              |
| JW2301                                                                                                                                                                                                                                                                                    | 5'-<br>AAAAGTATAACTTGCTTTACGCTAAGGATATA<br>AATCGGACGTAACCTAAG<br>ATGTGTGGTATTTTCGAAGCTTTC -3' | Forward; with 50 nt upstream of <i>ASN1</i> start codon + the first 24 nt of <i>ASN1</i> coding sequence with A6E mutation codon (underlined) | JW2160    | 4240 bp      |
| JW2160                                                                                                                                                                                                                                                                                    | 5'-<br>AAATATCTATAAGATTAATCCATAATTCTTTTT<br>CTATTTTTTAATGTTATATCGATGAATTCGAGCT<br>CG -3'      | Reverse; with 50 nt downstream of <i>ASN1</i> stop codon and sequence homology to pFA6a- <i>asn1</i> (A6E)-GFP-kanMX6 (underlined)            | JW2301    |              |

| Primer                                                                                                                                                                  | Sequence                        | Description                                                      | Used with | Product size |
|-------------------------------------------------------------------------------------------------------------------------------------------------------------------------|---------------------------------|------------------------------------------------------------------|-----------|--------------|
| <b>Primers used to prepare PCR products (using genomic DNA isolated from yeast transformants as DNA templates) for strain verification by DNA sequencing (Macrogen)</b> |                                 |                                                                  |           |              |
| <b>Verified yeast strain: <i>asn1(A6E)::GFP (asn2Δ)</i></b>                                                                                                             |                                 |                                                                  |           |              |
| JW2010                                                                                                                                                                  | 5'- CTGCCCACTCGAGATGACAAATA -3' | Forward; located 200 nt upstream of <i>ASN1</i> start codon      | JW1623    | 2829 bp      |
| JW1623                                                                                                                                                                  | 5'- GCGACCTCATACTATACCTG -3'    | Reverse; located 184 nt downstream of <i>GFP</i> coding sequence | JW2010    |              |
| <b>DNA sequencing primers</b>                                                                                                                                           |                                 |                                                                  |           |              |
| JW2010                                                                                                                                                                  | 5'- CTGCCCACTCGAGATGACAAATA -3' | Forward; located 200 nt upstream of <i>ASN1</i> start codon      |           |              |
| JW2038                                                                                                                                                                  | 5'- CGCATTCTTCCACCCCAATAG -3'   | Forward; located at nt601-622 of <i>ASN1</i> coding sequence     |           |              |
| JW2039                                                                                                                                                                  | 5'- ACATCGATCCAAATGAAAAGATG -3' | Forward; located at nt1301-1323 of <i>ASN1</i> coding sequence   |           |              |
| JW1623                                                                                                                                                                  | 5'- GCGACCTCATACTATACCTG -3'    | Reverse; located 184 nt downstream of <i>GFP</i> coding sequence |           |              |

**Table S2.** Numerical and statistical data for two yeast strains, *ASN1(WT)::GFP (asn2Δ)* and *asn1(A6E)::GFP (asn2Δ)*, used to plot graphs of assembly kinetics, sodium azide treatment, and fresh glucose addition, as shown in Figure 4 and 5.

| <b>Assembly Kinetics</b>                                      |         |                                                   |                                                  |                         |                                   |
|---------------------------------------------------------------|---------|---------------------------------------------------|--------------------------------------------------|-------------------------|-----------------------------------|
| Yeast strain                                                  | Clone # | % Cells with Asn1p-GFP structures (average ± SEM) |                                                  |                         |                                   |
|                                                               |         | Log-phase                                         | Day 1                                            | Day 5                   |                                   |
| <i>ASN1(WT)::GFP (asn2Δ)</i>                                  | 1       | 0.1 ± 0.13                                        | 26.1 ± 2.98                                      | 95.7 ± 0.93             |                                   |
|                                                               | 2       | 0.1 ± 0.11                                        | 33.7 ± 2.61                                      | 99.2 ± 0.79             |                                   |
| <i>asn1(A6E)::GFP (asn2Δ)</i>                                 | 1       | 0.0 ± 0.00                                        | 13.4 ± 0.84                                      | 10.9 ± 1.39             |                                   |
|                                                               | 2       | 0.0 ± 0.00                                        | 10.7 ± 0.77                                      | 10.5 ± 1.36             |                                   |
| P-value (A6E vs. WT)                                          |         | 0.0529 <sup>ns</sup><br>(two-tailed)              | 0.1788 <sup>ns</sup><br>(two-tailed)             | 0.0142*<br>(two-tailed) |                                   |
| <b>Log-Phase Culture with Sodium Azide Treatment (15 min)</b> |         |                                                   |                                                  |                         |                                   |
| Yeast strain                                                  | Clone # | % Cells with Asn1p-GFP structures (average ± SEM) |                                                  | P-value (two-tailed)    | Significantly different (< 0.05)? |
|                                                               |         | (1: 100) sterile water: log-phase culture         | (1: 100) 1M NaN <sub>3</sub> : log-phase culture |                         |                                   |
| <i>ASN1(WT)::GFP (asn2Δ)</i>                                  | 1       | 0.1 ± 0.09                                        | 71.3 ± 8.84                                      | 0.0153*                 | Yes                               |
|                                                               | 2       | 0.0 ± 0.00                                        | 57.6 ± 12.12                                     | 0.0415*                 | Yes                               |
| <i>asn1(A6E)::GFP (asn2Δ)</i>                                 | 1       | 0.0 ± 0.00                                        | 1.6 ± 0.81                                       | 0.1883 <sup>ns</sup>    | No                                |
|                                                               | 2       | 0.0 ± 0.00                                        | 2.7 ± 1.44                                       | 0.2060 <sup>ns</sup>    | No                                |
| <b>5-Day Culture with Fresh Glucose Treatment (15 min)</b>    |         |                                                   |                                                  |                         |                                   |
| Yeast strain                                                  | Clone # | % Cells with Asn1p-GFP structures (average ± SEM) |                                                  | P-value (two-tailed)    | Significantly different (< 0.05)? |
|                                                               |         | (1: 20) sterile water: 5-day culture              | (1: 20) 40% (w/v) glucose: 5-day culture         |                         |                                   |
| <i>ASN1(WT)::GFP (asn2Δ)</i>                                  | 1       | 96.6 ± 1.22                                       | 0.7 ± 0.39                                       | 0.0002***               | Yes                               |
|                                                               | 2       | 97.0 ± 0.26                                       | 0.8 ± 0.31                                       | <0.0001****             | Yes                               |
| <i>asn1(A6E)::GFP (asn2Δ)</i>                                 | 1       | 13.4 ± 2.02                                       | 14.9 ± 3.06                                      | 0.2873 <sup>ns</sup>    | No                                |
|                                                               | 2       | 11.8 ± 1.46                                       | 10.2 ± 1.15                                      | 0.5081 <sup>ns</sup>    | No                                |

Notes: ns ( $p$ -value > 0.05), \* ( $p$ -value ≤ 0.05), \*\* ( $p$ -value ≤ 0.01), \*\*\* ( $p$ -value ≤ 0.001), and \*\*\*\* ( $p$ -value ≤ 0.0001).
